# Supplementary material
Source: ML conference proceedings conference paper supplement (https://proceedings.mlr.press/v37/lesner15.html)
Supplement: Supplementary file 1 [file lesner15-supp.pdf]

## Supplementary Material for Non-Stationary Approximate Modified Policy Iteration

### A. Proof of Theorem 3

For clarity, we here provide a detailed and complete proof. Throughout this proof we will write  $P_k$  (resp.  $P_*$ ) for the transition kernel  $P_{\pi_k}$  (resp.  $P_{\pi_*}$ ) induced by the stationary policy  $\pi_k$  (resp.  $\pi_*$ ). We will write  $T_k$  (resp.  $T_*$ ) for the associated Bellman operator. Similarly, we will write  $P_{k,\ell}$  for the transition kernel associated with the non-stationary policy  $\pi_{k,\ell}$  and  $T_{k,\ell}$  for its associated Bellman operator.

For  $k \geq 0$  we define the following quantities:

- $b_k = T_{k+1}v_k - T_{k+1,\ell}T_{k+1}v_k$ . This quantity which we will call the *residual* may be viewed as a non-stationary analogue of the Bellman residual  $v_k - T_{k+1}v_k$ .
- $s_k = v_k - v_{\pi_{k,\ell}} - \epsilon_k$ . We will call it *shift*, as it measures the shift between the value  $v_{\pi_{k,\ell}}$  and the estimate  $v_k$  before incurring the error.
- $d_k = v_* - v_k + \epsilon_k$ . This quantity, called *distance* thereafter, provides the distance between the  $k^{\text{th}}$  value function (before the error is added) and the optimal value function.
- $l_k = v_* - v_{\pi_{k,\ell}}$ . This is the *loss* of the policy  $v_{\pi_{k,\ell}}$ . The loss is always non-negative since no policy can have a value greater than or equal to  $v_*$ .

The proof is outlined as follows. We first provide a bound on  $b_k$  which will be used to express both the bounds on  $s_k$  and  $d_k$ . Then, observing that  $l_k = s_k + d_k$  will allow to express the bound of  $\|l_k\|_\infty$  stated by Theorem 3. Our arguments extend those made by Scherrer et al. (2012) in the specific case  $\ell = 1$ .

We will repeatedly use the fact that since policy  $\pi_{k+1}$  is greedy with respect to  $v_k$ , we have

$$\forall \pi', T_{k+1}v_k \geq T_{\pi'}v_k. \quad (5)$$

For a non-stationary policy  $\pi_{k,\ell}$ , the induced  $\ell$ -step transition kernel is

$$P_{k,\ell} = P_k P_{k-1} \cdots P_{k-\ell+1}.$$

As a consequence, for any function  $f : \mathcal{S} \rightarrow \mathbb{R}$ , the operator  $T_{k,\ell}$  may be expressed as:

$$T_{k,\ell}f = r_k + \gamma P_{k,1}r_{k-1} + \gamma^2 P_{k,2}r_{k-2} + \cdots + \gamma^{\ell-1} P_{k,\ell-1}r_{k-\ell+1} + \gamma^\ell P_{k,\ell}f$$

then, for any function  $g : \mathcal{S} \rightarrow \mathbb{R}$ , we have

$$T_{k,\ell}f - T_{k,\ell}g = \gamma^\ell P_{k,\ell}(f - g) \quad (6)$$

and

$$T_{k,\ell}(f + g) = T_{k,\ell}f + \gamma^\ell P_{k,\ell}(g). \quad (7)$$

The following notation will be useful.

**Definition 1** (Scherrer et al. (2012)). For a positive integer  $n$ , we define  $\mathbb{P}_n$  as the set of discounted transition kernels that are defined as follows:

1. for any set of  $n$  policies  $\{\pi_1, \dots, \pi_n\}$ ,  $(\gamma P_{\pi_1})(\gamma P_{\pi_2}) \cdots (\gamma P_{\pi_n}) \in \mathbb{P}_n$ ,
2. for any  $\alpha \in (0, 1)$  and  $P_1, P_2 \in \mathbb{P}_n$ ,  $\alpha P_1 + (1 - \alpha)P_2 \in \mathbb{P}_n$

With some abuse of notation, we write  $\Gamma^n$  for denoting any element of  $\mathbb{P}_n$ .

**Example 1** ( $\Gamma^n$  notation). *If we write a transition kernel  $P$  as  $P = \alpha_1 \Gamma^i + \alpha_2 \Gamma^j \Gamma^k = \alpha_1 \Gamma^i + \alpha_2 \Gamma^{j+k}$ , it should be read as: “There exists  $P_1 \in \mathbb{P}_i, P_2 \in \mathbb{P}_j, P_3 \in \mathbb{P}_k$  and  $P_4 \in \mathbb{P}_{j+k}$  such that  $P = \alpha_1 P_1 + \alpha_2 P_2 P_3 = \alpha_1 P_1 + \alpha_2 P_4$ .”*

We first provide three lemmas bounding the residual, the shift and the distance, respectively.

**Lemma 2** (residual bound). *The residual  $b_k$  satisfies the following bound:*

$$b_k \leq \sum_{i=1}^k \Gamma^{(\ell m+1)(k-i)} x_i + \Gamma^{(\ell m+1)k} b_0$$

where

$$x_k = (I - \Gamma^\ell) \Gamma \epsilon_k.$$

*Proof.* We have:

$$\begin{aligned} b_k &= T_{k+1} v_k - T_{k+1, \ell} T_{k+1} v_k \\ &\leq T_{k+1} v_k - T_{k+1, \ell} T_{k-\ell+1} v_k && \{T_{k+1} v_k \geq T_{k-\ell+1} v_k \text{ (5)}\} \\ &= T_{k+1} v_k - T_{k+1} T_{k, \ell} v_k \\ &= \gamma P_{k+1} (v_k - T_{k, \ell} v_k) \\ &= \gamma P_{k+1} ((T_{k, \ell})^m T_k v_{k-1} + \epsilon_k - T_{k, \ell} ((T_{k, \ell})^m T_k v_{k-1} + \epsilon_k)) \\ &= \gamma P_{k+1} ((T_{k, \ell})^m T_k v_{k-1} - (T_{k, \ell})^{m+1} T_k v_{k-1} + (I - \gamma^\ell P_{k, \ell}) \epsilon_k) && \{(7)\} \\ &= \gamma P_{k+1} ((\gamma^\ell P_{k, \ell})^m (T_k v_{k-1} - T_{k, \ell} T_k v_{k-1}) + (I - \gamma^\ell P_{k, \ell}) \epsilon_k) && \{(6)\} \\ &= \gamma P_{k+1} ((\gamma^\ell P_{k, \ell})^m b_{k-1} + (I - \gamma^\ell P_{k, \ell}) \epsilon_k). \end{aligned}$$

Which can be written as

$$b_k \leq \Gamma(\Gamma^{\ell m} b_{k-1} + (I - \Gamma^\ell) \epsilon_k) = \Gamma^{\ell m+1} b_{k-1} + x_k.$$

Then, by induction:

$$b_k \leq \sum_{i=0}^{k-1} \Gamma^{(\ell m+1)i} x_{k-i} + \Gamma^{(\ell m+1)k} b_0 = \sum_{i=1}^k \Gamma^{(\ell m+1)(k-i)} x_i + \Gamma^{(\ell m+1)k} b_0.$$

□

**Lemma 3** (distance bound). *The distance  $d_k$  satisfies the following bound:*

$$d_k \leq \sum_{i=1}^k \sum_{j=0}^{mi-1} \Gamma^{\ell j+i-1} x_{k-i} + \sum_{i=1}^k \Gamma^{i-1} y_{k-i} + z_k,$$

where

$$y_k = -\Gamma \epsilon_k$$

and

$$z_k = \sum_{i=0}^{mk-1} \Gamma^{k-1+\ell i} b_0 + \Gamma^k d_0.$$

*Proof.* First expand  $d_k$ :

$$\begin{aligned}
 d_k &= v_* - v_k + \epsilon_k \\
 &= v_* - (T_{k,\ell})^m T_k v_{k-1} \\
 &= v_* - T_k v_{k-1} + T_k v_{k-1} - T_{k,\ell} T_k v_{k-1} + T_{k,\ell} T_k v_{k-1} - (T_{k,\ell})^2 T_k v_{k-1} \\
 &\quad + (T_{k,\ell})^2 T_k v_{k-1} - \dots - (T_{k,\ell})^{m-1} T_k v_{k-1} + (T_{k,\ell})^{m-1} T_k v_{k-1} - (T_{k,\ell})^m T_k v_{k-1} \\
 &= v_* - T_k v_{k-1} + \sum_{i=0}^{m-1} (T_{k,\ell})^i T_k v_{k-1} - (T_{k,\ell})^{i+1} T_k v_{k-1} \\
 &= T_* v_* - T_k v_{k-1} + \sum_{i=0}^{m-1} (\gamma^\ell P_{k,\ell})^i (T_k v_{k-1} - T_{k,\ell} T_k v_{k-1}) \tag{6} \\
 &\leq T_* v_* - T_* v_{k-1} + \sum_{i=0}^{m-1} (\gamma^\ell P_{k,\ell})^i b_{k-1} \tag{5} \quad \{T_k v_{k-1} \geq T_* v_{k-1}\} \\
 &= \gamma P_*(v_* - v_{k-1}) + \sum_{i=0}^{m-1} (\gamma^\ell P_{k,\ell})^i b_{k-1} \tag{6} \\
 &= \gamma P_* d_{k-1} - \gamma P_* \epsilon_{k-1} + \sum_{i=0}^{m-1} (\gamma^\ell P_{k,\ell})^i b_{k-1} \tag{5} \quad \{d_k = v_* - v_k + \epsilon_k\} \\
 &= \Gamma d_{k-1} + y_{k-1} + \sum_{i=0}^{m-1} \Gamma^{\ell i} b_{k-1}.
 \end{aligned}$$

Then, by induction

$$d_k \leq \sum_{j=0}^{k-1} \Gamma^{k-1-j} \left( y_j + \sum_{p=0}^{m-1} \Gamma^{\ell p} b_j \right) + \Gamma^k d_0.$$

Using the bound on  $b_k$  from Lemma 2 we get:

$$\begin{aligned}
 d_k &\leq \sum_{j=0}^{k-1} \Gamma^{k-1-j} \left( y_j + \sum_{p=0}^{m-1} \Gamma^{\ell p} \left( \sum_{i=1}^j \Gamma^{(\ell m+1)(j-i)} x_i + \Gamma^{(\ell m+1)j} b_0 \right) \right) + \Gamma^k d_0 \\
 &= \sum_{j=0}^{k-1} \sum_{p=0}^{m-1} \sum_{i=1}^j \Gamma^{k-1-j+\ell p+(\ell m+1)(j-i)} x_i + \sum_{j=0}^{k-1} \sum_{p=0}^{m-1} \Gamma^{k-1-j+\ell p+(\ell m+1)j} b_0 + \Gamma^k d_0 + \sum_{i=1}^k \Gamma^{i-1} y_{k-i}.
 \end{aligned}$$

First we have:

$$\begin{aligned}
 \sum_{j=0}^{k-1} \sum_{p=0}^{m-1} \sum_{i=1}^j \Gamma^{k-1-j+\ell p+(\ell m+1)(j-i)} x_i &= \sum_{i=1}^{k-1} \sum_{j=i}^{k-1} \sum_{p=0}^{m-1} \Gamma^{k-1+\ell(p+mj)-i(\ell m+1)} x_i \\
 &= \sum_{i=1}^{k-1} \sum_{j=0}^{m(k-i)-1} \Gamma^{k-1+\ell(j+mi)-i(\ell m+1)} x_i \\
 &= \sum_{i=1}^{k-1} \sum_{j=0}^{m(k-i)-1} \Gamma^{\ell j+k-i-1} x_i \\
 &= \sum_{i=1}^{k-1} \sum_{j=0}^{mi-1} \Gamma^{\ell j+i-1} x_{k-i}.
 \end{aligned}$$

Second we have:

$$\sum_{j=0}^{k-1} \sum_{p=0}^{m-1} \Gamma^{k-1-j+\ell p+(\ell m+1)j} b_0 = \sum_{j=0}^{k-1} \sum_{p=0}^{m-1} \Gamma^{k-1+\ell(p+mj)} b_0 = \sum_{i=0}^{mk-1} \Gamma^{k-1+\ell i} b_0 = z_k - \Gamma^k d_0.$$

Hence

$$d_k \leq \sum_{i=1}^k \sum_{j=0}^{mi-1} \Gamma^{\ell j+i-1} x_{k-i} + \sum_{i=1}^k \Gamma^{i-1} y_{k-i} + z_k.$$

□

**Lemma 4** (shift bound). *The shift  $s_k$  is bounded by:*

$$s_k \leq \sum_{i=1}^{k-1} \sum_{j=mi}^{\infty} \Gamma^{\ell j+i-1} x_{k-i} + w_k,$$

where

$$w_k = \sum_{j=mk}^{\infty} \Gamma^{\ell j+k-1} b_0.$$

*Proof.* Expanding  $s_k$  we obtain:

$$\begin{aligned} s_k &= v_k - v_{\pi_{k,\ell}} - \epsilon_k \\ &= (T_{k,\ell})^m T_k v_{k-1} - v_{\pi_{k,\ell}} \\ &= (T_{k,\ell})^m T_k v_{k-1} - (T_{k,\ell})^\infty T_{k,\ell} T_k v_{k-1} && \{\forall f : v_{\pi_{k,\ell}} = (T_{k,\ell})^\infty f\} \\ &= (\gamma^\ell P_{k,\ell})^m \sum_{j=0}^{\infty} (\gamma^\ell P_{k,\ell})^j (T_k v_{k-1} - T_{k,\ell} T_k v_{k-1}) \\ &= \Gamma^{\ell m} \sum_{j=0}^{\infty} \Gamma^{\ell j} b_{k-1} \\ &= \sum_{j=0}^{\infty} \Gamma^{\ell m+\ell j} b_{k-1}. \end{aligned}$$

Plugging the bound on  $b_k$  of Lemma 2 we get:

$$\begin{aligned} s_k &\leq \sum_{j=0}^{\infty} \Gamma^{\ell m+\ell j} \left( \sum_{i=1}^{k-1} \Gamma^{(\ell m+1)(k-1-i)} x_i + \Gamma^{(\ell m+1)(k-1)} b_0 \right) \\ &= \sum_{j=0}^{\infty} \sum_{i=1}^{k-1} \Gamma^{\ell m+\ell j+(\ell m+1)(k-1-i)} x_i + \sum_{j=0}^{\infty} \Gamma^{\ell m+\ell j+(\ell m+1)(k-1)} b_0 \\ &= \sum_{j=0}^{\infty} \sum_{i=1}^{k-1} \Gamma^{\ell(j+mi)+i-1} x_{k-i} + \sum_{j=0}^{\infty} \Gamma^{\ell(j+mk)+k-1} b_0 \\ &= \sum_{i=1}^{k-1} \sum_{j=mi}^{\infty} \Gamma^{\ell j+i-1} x_{k-i} + \sum_{j=mk}^{\infty} \Gamma^{\ell j+k-1} b_0 \\ &= \sum_{i=1}^{k-1} \sum_{j=mi}^{\infty} \Gamma^{\ell j+i-1} x_{k-i} + w_k. \end{aligned}$$

□

**Lemma 5** (loss bound). *The loss  $l_k$  is bounded by:*

$$l_k \leq \sum_{i=1}^{k-1} \Gamma^i \left( \sum_{j=0}^{\infty} \Gamma^{\ell j} (I - \Gamma^\ell) - I \right) \epsilon_{k-i} + \eta_k,$$

where

$$\eta_k = z_k + w_k = \sum_{i=0}^{mk-1} \Gamma^{k-1+\ell i} b_0 + \Gamma^k d_0 + \sum_{j=mk}^{\infty} \Gamma^{\ell j+k-1} b_0 = \sum_{i=0}^{\infty} \Gamma^{\ell i+k-1} b_0 + \Gamma^k d_0.$$

*Proof.* Using Lemmas 3 and 4, we have:

$$\begin{aligned} l_k &= s_k + d_k \\ &\leq \sum_{i=1}^{k-1} \sum_{j=mi}^{\infty} \Gamma^{\ell j+i-1} x_{k-i} + \sum_{i=1}^{k-1} \sum_{j=0}^{mi-1} \Gamma^{\ell j+i-1} x_{k-i} + \sum_{i=1}^k \Gamma^{i-1} y_{k-i} + z_k + w_k \\ &= \sum_{i=1}^{k-1} \sum_{j=0}^{\infty} \Gamma^{\ell j+i-1} x_{k-i} + \sum_{i=1}^k \Gamma^{i-1} y_{k-i} + \eta_k. \end{aligned}$$

Plugging back the values of  $x_k$  and  $y_k$  and using the fact that  $\epsilon_0 = 0$  we obtain:

$$\begin{aligned} l_k &\leq \sum_{i=1}^{k-1} \sum_{j=0}^{\infty} \Gamma^{\ell j+i-1} (I - \Gamma^\ell) \Gamma \epsilon_{k-i} + \sum_{i=1}^{k-1} \Gamma^{i-1} (-\Gamma) \epsilon_{k-i} - \Gamma^k \epsilon_0 + \eta_k \\ &= \sum_{i=1}^{k-1} \left( \sum_{j=0}^{\infty} \Gamma^{\ell j+i} (I - \Gamma^\ell) \epsilon_{k-i} - \Gamma^i \epsilon_{k-i} \right) + \eta_k \\ &= \sum_{i=1}^{k-1} \Gamma^i \left( \sum_{j=0}^{\infty} \Gamma^{\ell j} (I - \Gamma^\ell) - I \right) \epsilon_{k-i} + \eta_k. \end{aligned}$$

□

We now provide a bound of  $\eta_k$  in terms of  $d_0$ :

**Lemma 6.**

$$\eta_k \leq \Gamma^k \left( \sum_{i=0}^{\infty} \Gamma^i (\Gamma - I) + I \right) d_0.$$

*Proof.* First recall that

$$\eta_k = \sum_{i=0}^{\infty} \Gamma^{\ell i+k-1} b_0 + \Gamma^k d_0.$$

In order to bound  $\eta_k$  in terms of  $d_0$  only, we express  $b_0$  in terms of  $d_0$ :

$$\begin{aligned}
 b_0 &= T_1 v_0 - (T_1)^\ell T_1 v_0 \\
 &= T_1 v_0 - (T_1)^2 v_0 + (T_1)^2 v_0 - \cdots - (T_1)^\ell v_0 + (T_1)^\ell v_0 - (T_1)^{\ell+1} v_0 \\
 &= \sum_{i=1}^{\ell} (\gamma P_1)^i (v_0 - T_1 v_0) \\
 &= \sum_{i=1}^{\ell} (\gamma P_1)^i (v_0 - v_* + T_* v_* - T_* v_0 + T_* v_0 - T_1 v_0) \\
 &\leq \sum_{i=1}^{\ell} (\gamma P_1)^i (v_0 - v_* + T_* v_* - T_* v_0) && \{T_1 v_0 \geq T_* v_0 \text{ (5)}\} \\
 &= \sum_{i=1}^{\ell} (\gamma P_1)^i (\gamma P_* - I) d_0.
 \end{aligned}$$

Consequently, we have:

$$\begin{aligned}
 \eta_k &\leq \sum_{i=0}^{\infty} \Gamma^{\ell i + k - 1} \sum_{j=1}^{\ell} (\gamma P_1)^j (\gamma P_* - I) d_0 + \Gamma^k d_0 \\
 &= \sum_{i=0}^{\infty} \Gamma^{\ell i + k} \sum_{j=0}^{\ell-1} (\gamma P_1)^j (\gamma P_* - I) d_0 + \Gamma^k d_0 \\
 &= \Gamma^k \left( \sum_{i=0}^{\infty} \Gamma^{\ell i} \sum_{j=0}^{\ell-1} \Gamma^j (\Gamma - I) + I \right) d_0 \\
 &= \Gamma^k \left( \sum_{i=0}^{\infty} \Gamma^i (\Gamma - I) + I \right) d_0.
 \end{aligned}$$

□

We now conclude the proof of Theorem 3. Taking the absolute value in Lemma 6 we obtain:

$$|\eta_k| \leq \Gamma^k \left( \sum_{i=0}^{\infty} \Gamma^i (\Gamma + I) + I \right) |d_0| = 2 \sum_{i=k}^{\infty} \Gamma^i |d_0|$$

Since  $l_k$  is non-negative, from Lemma 5 we have:

$$|l_k| \leq \sum_{i=1}^{k-1} \Gamma^i \left( \sum_{j=0}^{\infty} \Gamma^{\ell j} (I + \Gamma^\ell) + I \right) |\epsilon_{k-i}| + |\eta_k| = 2 \sum_{i=1}^{k-1} \Gamma^i \sum_{j=0}^{\infty} \Gamma^{\ell j} |\epsilon_{k-i}| + 2 \sum_{i=k}^{\infty} \Gamma^i |d_0|. \quad (8)$$

Since  $\|v\|_\infty = \max |v|$ ,  $d_0 = v_* - v_0$  and  $l_k = v_* - v_{\pi_{k,\ell}}$ , we can take the maximum in (8) and conclude that:

$$\|v_* - v_{\pi_{k,\ell}}\|_\infty \leq \frac{2(\gamma - \gamma^k)}{(1 - \gamma)(1 - \gamma^\ell)} 2\epsilon + \frac{\gamma^k}{1 - \gamma} \|v_* - v_0\|_\infty.$$

## B. Proof of Theorem 4

We shall prove the following result.

**Lemma 7.** Consider NS-AMPI with parameters  $m \geq 0$  and  $\ell \geq 1$  applied on the problem of Figure 1, starting from  $v_0 = 0$  and all initial policies  $\pi_0, \pi_{-1}, \dots, \pi_{-\ell+2}$  equal to  $\pi_*$ . Assume that at each iteration  $k$ , the following error terms are applied, for some  $\epsilon \geq 0$ :

$$\forall i, \epsilon_k(i) = \begin{cases} -\epsilon & \text{if } i = k \\ \epsilon & \text{if } i = k + \ell \\ 0 & \text{otherwise} \end{cases}.$$

Then NS-AMPI can<sup>8</sup> generate a sequence of value-policy pairs that is described below.

For all iterations  $k \geq 1$ , the policy  $\pi_k$  takes the optimal action in all states but  $k$ , that is

$$\forall i \geq 2, \pi_k(i) = \begin{cases} \rightarrow & \text{if } i = k \\ \leftarrow & \text{otherwise} \end{cases} \quad (9)$$

For all iterations  $k \geq 1$ , the value function  $v_k$  satisfies the following equations:

- For all  $i < k$ :

$$v_k(i) = -\gamma^{(k-1)(\ell m+1)} \epsilon \quad (10.a)$$

- For all  $i$  such that  $k \leq i \leq k + ((k-1)m + 1)\ell$ :

- For  $i = k + (qm + p + 1)\ell$  with  $q \geq 0$  and  $0 \leq p < m$  (i.e.  $i = k + n\ell$ ,  $n \geq 1$ ):

$$v_k(i) = \gamma^{q(\ell m+1)} \left( \frac{\gamma^{\ell(p+1)} - \gamma^{\ell(m+1)}}{1 - \gamma^\ell} r_{k-q} + \mathbb{1}_{[p=0]} \epsilon + \sum_{j=1}^{k-q-1} \gamma^{j(\ell m+1)} \left( \frac{\gamma^\ell - \gamma^{\ell(m+1)}}{1 - \gamma^\ell} r_{k-q-j} + \epsilon \right) \right) \quad (10.b)$$

- For  $i = k$ :

$$v_k(k) = v_k(k + \ell) + r_k - 2\epsilon \quad (10.c)$$

- For  $i = k + q\ell + p$  with  $0 \leq q \leq (k-1)m - 1$  and  $1 \leq p < \ell$ :

$$v_k(i) = -\gamma^{(k-1)(\ell m+1)} \epsilon \quad (10.d)$$

- Otherwise, i.e. when  $i = k + (k-1)m\ell + p$  with  $1 \leq p < \ell$ :

$$v_k(i) = 0 \quad (10.e)$$

- For all  $i > k + ((k-1)m + 1)\ell$

$$v_k(i) = 0 \quad (10.f)$$

The relative complexity of the different expressions of  $v_k$  in Lemma 7 is due to the presence of nested periodic patterns in the shape of the value function along the state space and the horizon. Figures 4 and 5 give the shape of the value function for different values of  $\ell$  and  $m$ , exhibiting the periodic patterns. The proof of Lemma 7 is done by recurrence on  $k$ .

### B.1. Base case $k = 1$

Since  $v_0 = 0$ ,  $\pi_1$  is the optimal policy that takes  $\leftarrow$  in all states as desired. Hence,  $(T_{1,\ell})^m T_1 v_0 = 0$  in all states. Accounting for the errors  $\epsilon_1$  we have  $v_1 = (T_{1,\ell})^m T_1 v_0 + \epsilon_1 = \epsilon_1$ . As can be seen on Figures 4 and 5, when  $k = 1$  we only need to consider equations (10.b), (10.c), (10.e) and (10.f) since the others apply to an empty set of states.

First, we have

$$v_1(1 + \ell) = \epsilon_1(1 + \ell) = \epsilon$$

<sup>8</sup>We write here “can” since at each iteration, several policies will be greedy with respect to the current value.

Non-Stationary Approximate Modified Policy Iteration

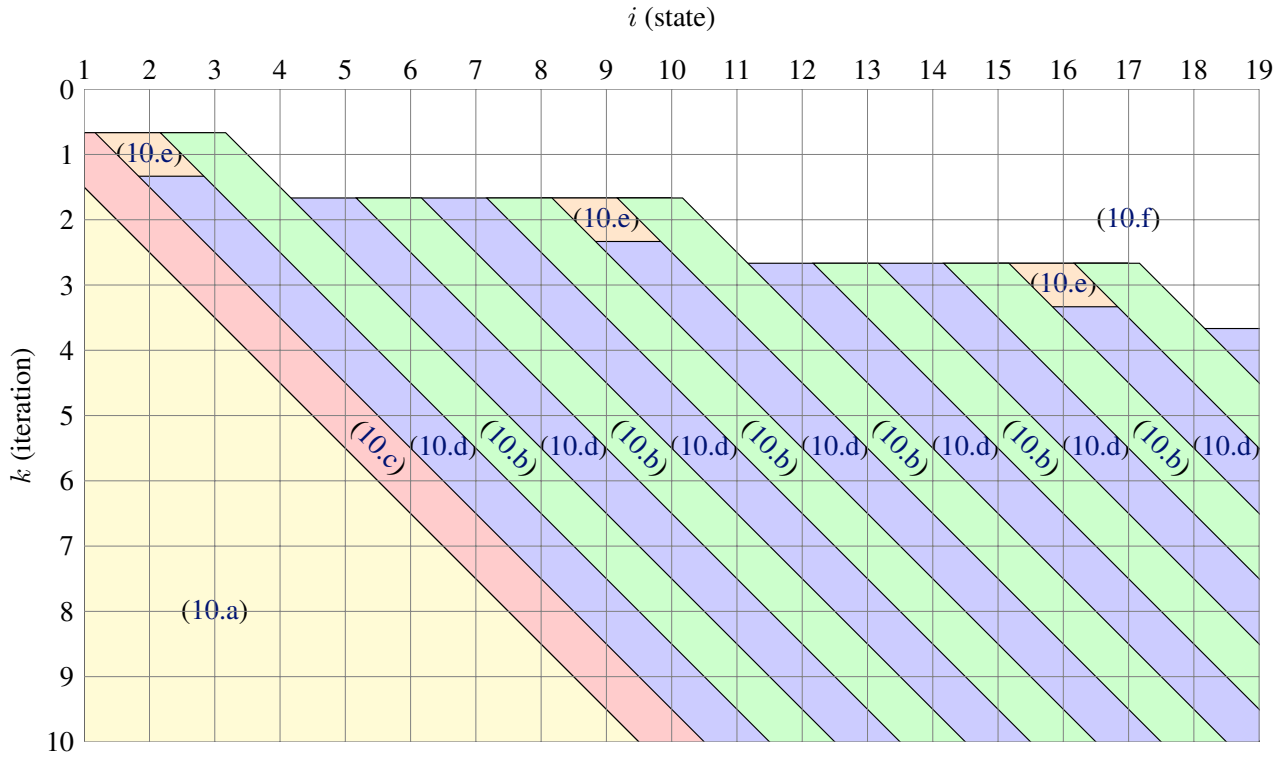

Figure 4. Shape of the value function with  $\ell = 2$  and  $m = 3$ .

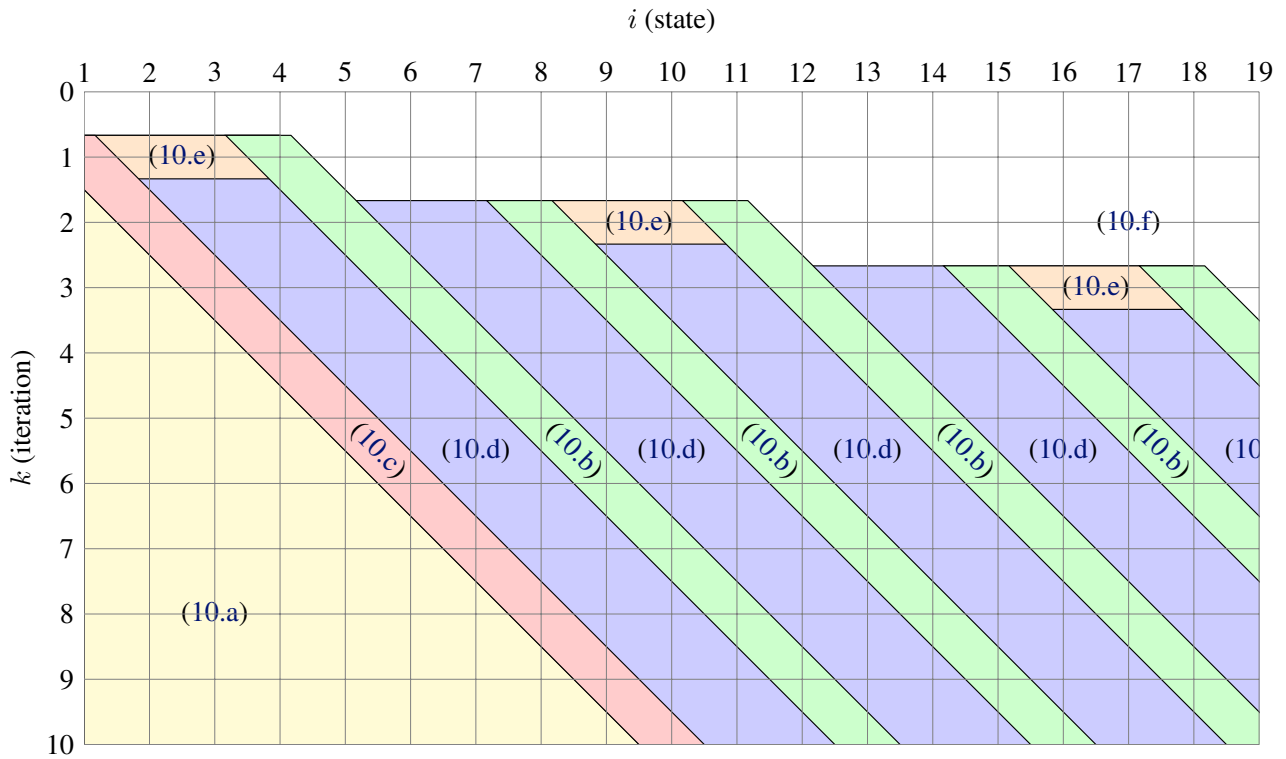

Figure 5. Shape of the value function with  $\ell = 3$  and  $m = 2$ .



which is (10.b) when  $q = (k - 1) = 0$  and  $p = 0$ .

Second, we have

$$v_1(1) = \epsilon_1(1) = -\epsilon = \epsilon + 0 - 2\epsilon = v_1(1 + \ell) + r_1 - 2\epsilon$$

which corresponds to (10.c).

Third, for  $1 \leq p < \ell$  we have

$$v_1(1 + p) = \epsilon_1(1 + p) = 0$$

corresponding to (10.e).

Finally, for all the remaining states  $i > 1 + \ell$ , we have

$$v_1(i) = \epsilon_1(i) = 0$$

corresponding to (10.f).

The base case is now proved.

## B.2. Induction Step

We assume that Lemma 7 holds for some *fixed*  $k \geq 1$ , we now show that it also holds for  $k + 1$ .

### B.2.1. THE POLICY $\pi_{k+1}$

We begin by showing that the policy  $\pi_{k+1}$  is greedy with respect to  $v_k$ . Since there is no choice in state 1 is  $\rightarrow$ , we turn our attention to the other states. There are many cases to consider, each one of them corresponding to one or more states. These cases, labelled from A through F, are summarized as follows, depending on the state  $i$ :

- (A)  $1 < i < k + 1$
- (B)  $i = k + 1$
- (C)  $i = k + 1 + q\ell + p$  with  $1 \leq p < \ell$  and  $0 \leq q \leq (k - 1)m$
- (D)  $i = k + 1 + (qm + p + 1)\ell$  with  $0 \leq p < m$  and  $0 \leq q < k - 1$
- (E)  $i = k + 1 + ((k - 1)m + 1)\ell$
- (F)  $i > k + 1 + ((k - 1)m + 1)\ell$

Figure 6 depicts how those cases cover the whole state space.

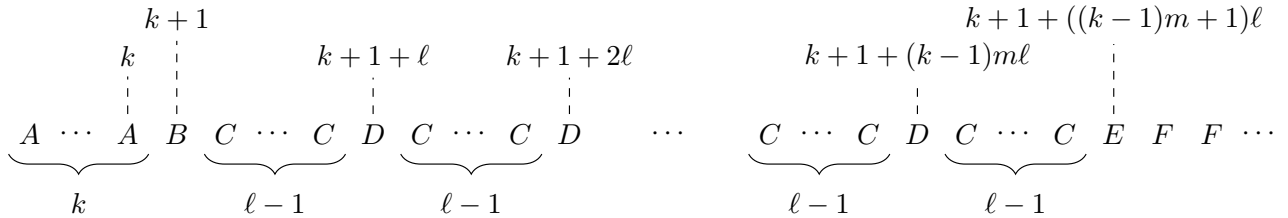

Figure 6. Policy cases, each state is represented by a letter corresponding to a case of the policy  $\pi_{k+1}$ . Starting from 1, state number increase from left to right.

For all states  $i > 1$  in each of the above cases, we consider the *action-value functions*  $q_{k+1}^{\rightarrow}(i)$  (resp.  $q_{k+1}^{\leftarrow}(i)$ ) of action  $\rightarrow$  (resp.  $\leftarrow$ ) defined as:

$$q_{k+1}^{\rightarrow}(i) = r_i + \gamma v_k(i - 1) \quad \text{and} \quad q_{k+1}^{\leftarrow}(i) = \gamma v_k(i + \ell - 1).$$

In case  $i = k + 1$  (B) we will show that  $q_{k+1}^{\rightarrow}(i) = q_{k+1}^{\leftarrow}(i)$  meaning that a policy  $\pi_{k+1}$  greedy for  $v_k$  may be either  $\pi_{k+1}(k + 1) = \rightarrow$  or  $\pi_{k+1}(k + 1) = \leftarrow$ . In all other cases we show that  $q_{k+1}^{\rightarrow}(i) < q_{k+1}^{\leftarrow}(i)$  which implies that for those  $i \neq k + 1$ ,  $\pi_{k+1}(i) = \leftarrow$ , as required by Lemma 7.

**A: In states**  $1 < i < k + 1$  We have  $q_{k+1}^{\rightarrow}(i) = r_i + \gamma v_k(i + \ell - 1)$  and  $q_{k+1}^{\leftarrow}(i) = \gamma v_k(i - 1)$ , depending on the value of  $i + \ell - 1$ , which is reached by taking the  $\rightarrow$  action, we need to consider two cases:

- Case 1:  $i + \ell - 1 \neq k$ . In this case  $v_k(i + \ell - 1)$  is described by either (10.a) or (10.d) when  $i + \ell - 1$  is less than, or greater than  $k$ , respectively. In either case we have  $v_k(i + \ell - 1) = -\gamma^{(k-1)(\ell m+1)}\epsilon = v_k(i - 1)$  and hence:

$$q_{k+1}^{\rightarrow}(i) = r_i + \gamma v_k(i + \ell - 1) = r_i + \gamma v_k(i - 1) < \gamma v_k(i - 1) = q_{k+1}^{\leftarrow}(i)$$

which gives  $\pi_{k+1}(i) = \leftarrow$  as desired.

- Case 2:  $i + \ell - 1 = k$ .

$$q_{k+1}^{\rightarrow}(i) = r_i + \gamma v_k(k) = r_i + \gamma (v_k(k + \ell) + r_k - 2\epsilon) \tag{10.c}$$

$$= \gamma \left( \sum_{j=0}^{k-1} \gamma^{j(\ell m+1)} \left( \frac{\gamma^\ell - \gamma^{\ell(m+1)}}{1 - \gamma^\ell} r_{k-j} + \epsilon \right) + r_k - 2\epsilon \right) \tag{10.b}$$

$$\leq \gamma \left( \sum_{j=0}^{k-1} \gamma^{j(\ell m+1)} \epsilon + r_k - 2\epsilon \right) \tag{10.d} \quad \{r_{k-j} \leq 0\}$$

$$= \gamma \left( \sum_{j=1}^{k-1} \left( \gamma^{j(\ell m+1)} \epsilon - 2\gamma^j \epsilon \right) - \epsilon \right) \quad \left\{ r_k = -2 \sum_{j=1}^{k-1} \gamma^j \epsilon \right\}$$

$$< -\gamma \epsilon \quad \{ \gamma^{j(\ell m+1)} \epsilon - 2\gamma^j \epsilon < 0 \}$$

$$< \gamma v_k(i - 1) \quad \{ v_k(i - 1) = -\gamma^{(k-1)(\ell m+1)} \epsilon \text{ (10.a)} \}$$

$$= q_{k+1}^{\leftarrow}(i)$$

giving  $\pi_{k+1}(i) = \leftarrow$  as desired.

**B: In state**  $k + 1$  Looking at the action value function  $q_{k+1}^{\leftarrow}$  in state  $k + 1$ , we observe that:

$$q_{k+1}^{\leftarrow}(k + 1) = \gamma v_k(k) = \gamma (r_k - 2\epsilon + v_k(k + \ell)) \tag{10.c}$$

$$= \gamma r_k - 2\gamma \epsilon + \gamma v_k(k + \ell)$$

$$= r_{k+1} + \gamma v_k(k + \ell)$$

$$= q_{k+1}^{\rightarrow}(k + 1)$$

$$\{ r_{i+1} = \gamma r_i - 2\gamma \epsilon \}$$

This means that the algorithm can take  $\pi_{k+1}(k + 1) = \rightarrow$  so as to satisfy Lemma 7.

**C: In states**  $i = k + 1 + q\ell + p$  We restrict ourselves to the cases when  $1 \leq p < \ell$  and  $0 \leq q \leq (k - 1)m$ . Three cases for the value of  $q$  need to be considered:

- Case 1:  $0 \leq q < (k - 1)m - 1$ . We have:

$$q_{k+1}^{\rightarrow}(i) = r_i + \gamma v_k(k + (q + 1)\ell + p)$$

$$= r_i + \gamma v_k(k + q\ell + p)$$

$$< \gamma v_k(k + q\ell + p)$$

$$= q_{k+1}^{\leftarrow}(i).$$

$$\{(10.d) \text{ independent of } q\}$$

$$\{r_i < 0\}$$

- Case 2:  $q = (k - 1)m - 1$

$$\begin{aligned}
 \bar{q}_{k+1}^{\rightarrow}(i) &= r_i + \gamma v_k(k + (q + 1)\ell + p) \\
 &= r_i + \gamma 0 && \{(10.e)\} \\
 &= -2\epsilon \frac{\gamma - \gamma^{k+1+q\ell+p}}{1 - \gamma} \\
 &= -2\epsilon \left( \frac{\gamma - \gamma^{k+q\ell+p}}{1 - \gamma} + \gamma^{k+q\ell+p} \right) \\
 &< -\gamma^{k+q\ell+p} \epsilon \\
 &= -\gamma^{k+(k-1)\ell m - \ell + p} \epsilon && \{q = (k - 1)m - 1\} \\
 &< -\gamma^{k+(k-1)\ell m} \epsilon = -\gamma^{(k-1)(\ell m + 1) + 1} \epsilon && \{p - \ell < 0\} \\
 &= \gamma v_k(k + q\ell + p) && \{(10.d)\} \\
 &= \bar{q}_{k+1}^{\leftarrow}(i).
 \end{aligned}$$

- Case 3:  $q = (k - 1)m$

$$\begin{aligned}
 \bar{q}_{k+1}^{\rightarrow}(i) &= r_i + \gamma v_k(k + ((k - 1)m + 1)\ell + p) && \{(10.f)\} \\
 &= r_i + \gamma 0 && \{(10.e)\} \\
 &= r_i + \gamma v_k(k + ((k - 1)m)\ell + p) && \{(10.e)\} \\
 &= r_i + \gamma v_k(i - 1) \\
 &< \bar{q}_{k+1}^{\leftarrow}(i). && \{r_i < 0\}
 \end{aligned}$$

**D: In states**  $i = k + 1 + (qm + p + 1)\ell$  In these states, we have:

$$\begin{aligned}
 \bar{q}_{k+1}^{\leftarrow}(i) &= \gamma v_k(k + (qm + p + 1)\ell) \\
 \bar{q}_{k+1}^{\rightarrow}(i) &= r_i + \gamma v_k(k + 1 + (qm + p + 1)\ell + \ell - 1) \\
 &= r_i + \gamma v_k(k + (qm + p + 2)\ell).
 \end{aligned} \tag{11}$$

As for the right-hand side of (11) we need to consider two cases:

- Case 1:  $p + 1 < m$ :

In the following, define

$$x_{k,q} = \sum_{j=1}^{k-q-1} \gamma^{j(\ell m + 1)} \left( \frac{\gamma^\ell - \gamma^{\ell(m+1)}}{1 - \gamma^\ell} r_{k-q-j} + \epsilon \right).$$

Then,

$$\begin{aligned}
 \bar{q}_{k+1}^{\rightarrow}(i) &= r_i + \gamma v_k(k + (qm + (p + 1) + 1)\ell) \\
 &= r_i + \gamma \gamma^{q(\ell m + 1)} \left( \frac{\gamma^{\ell(p+2)} - \gamma^{\ell(m+1)}}{1 - \gamma^\ell} r_{k-q} + \sum_{j=1}^{k-q-1} \gamma^{j(\ell m + 1)} \left( \frac{\gamma^\ell - \gamma^{\ell(m+1)}}{1 - \gamma^\ell} r_{k-q-j} + \epsilon \right) \right) && \{(10.b)\}
 \end{aligned}$$

$$\begin{aligned}
 &= r_i + \gamma^{q(\ell m + 1) + 1} \left( \left( \frac{\gamma^{\ell(p+1)} - \gamma^{\ell(m+1)}}{1 - \gamma^\ell} - \gamma^{\ell(p+1)} \right) r_{k-q} + x_{k,q} \right) \\
 &= r_i - \gamma^{(qm+p+1)\ell + q + 1} r_{k-q} + \gamma^{q(\ell m + 1) + 1} \left( \frac{\gamma^{\ell(p+1)} - \gamma^{\ell(m+1)}}{1 - \gamma^\ell} r_{k-q} + x_{k,q} \right) \\
 &= r_i - \gamma^{i-k+q} r_{k-q} + \gamma v_k(k + (qm + p + 1)\ell) - \mathbb{1}_{[p=0]} \gamma^{q(\ell m + 1) + 1} \epsilon && \{(10.b)\} \\
 &\leq r_i - \gamma^{i-k+q} r_{k-q} + \gamma v_k(k + (qm + p + 1)\ell) \\
 &= r_i - \gamma^{i-k+q} r_{k-q} + \bar{q}_{k+1}^{\leftarrow}(i).
 \end{aligned}$$

(12)

Now, observe that

$$\begin{aligned}
 \gamma^{i-k+q} r_{k-q} &= -2\gamma^{i-k+q} \frac{\gamma - \gamma^{k-q}}{1-\gamma} \epsilon \\
 &= -2 \frac{\gamma^{i-k+q+1} - \gamma^i}{1-\gamma} \epsilon \\
 &= -2 \frac{\gamma - \gamma + \gamma^{i-k+q+1} - \gamma^i}{1-\gamma} \epsilon \\
 &= -2 \frac{\gamma - \gamma^i}{1-\gamma} \epsilon - 2 \frac{-\gamma + \gamma^{i-k+q+1}}{1-\gamma} \epsilon \\
 &= r_i - r_{i-k+q+1}.
 \end{aligned}$$

Plugging this back into (12), we get:

$$\begin{aligned}
 q_{k+1}^{\rightarrow}(i) &\leq r_i - r_i + r_{i-k+q+1} + q_{k+1}^{\leftarrow}(i) \\
 &< q_{k+1}^{\leftarrow}(i). \qquad \{r_{i-k+q+1} < 0\}
 \end{aligned}$$

- Case 2:  $p+1 = m$ :

Using the fact that  $p+1 = m$  implies  $\frac{\gamma^{\ell(p+1)} - \gamma^{\ell(m+1)}}{1-\gamma^\ell} = \gamma^{\ell m}$  we have:

$$\begin{aligned}
 q_{k+1}^{\rightarrow}(i) &= r_i + \gamma v_k(k + ((q+1)m + 1)\ell) \\
 &= r_i + \gamma \gamma^{(q+1)(\ell m+1)} \left( \frac{\gamma^\ell - \gamma^{\ell(m+1)}}{1-\gamma^\ell} r_{k-q-1} + \epsilon + \sum_{j=1}^{k-q-2} \gamma^{j(\ell m+1)} \left( \frac{\gamma^\ell - \gamma^{\ell(m+1)}}{1-\gamma^\ell} r_{k-q-j-1} + \epsilon \right) \right) \quad \{(10.b)\} \\
 &= r_i + \gamma \gamma^{(q+1)(\ell m+1)} \left( \sum_{j=0}^{k-q-2} \gamma^{j(\ell m+1)} \left( \frac{\gamma^\ell - \gamma^{\ell(m+1)}}{1-\gamma^\ell} r_{k-q-j-1} + \epsilon \right) \right) \\
 &= r_i + \gamma \gamma^{q(\ell m+1)} \left( \sum_{j=1}^{k-q-1} \gamma^{j(\ell m+1)} \left( \frac{\gamma^\ell - \gamma^{\ell(m+1)}}{1-\gamma^\ell} r_{k-q-j} + \epsilon \right) \right) \\
 &= r_i + \gamma \gamma^{q(\ell m+1)} \left( \left( \frac{\gamma^{\ell(p+1)} - \gamma^{\ell(m+1)}}{1-\gamma^\ell} - \gamma^{\ell m} \right) r_{k-q} + \sum_{j=1}^{k-q-1} \gamma^{j(\ell m+1)} \left( \frac{\gamma^\ell - \gamma^{\ell(m+1)}}{1-\gamma^\ell} r_{k-q-j} + \epsilon \right) \right) \\
 &= r_i - \gamma^{q(\ell m+1)+1} \gamma^{\ell m} r_{k-q} + \gamma \left( v_k(k + (qm + p + 1)\ell) - \mathbb{1}_{[p=0]} \gamma^{q(\ell m+1)} \epsilon \right) \quad \{(10.b)\} \\
 &\leq r_i - \gamma^{i-k+q} r_{k-q} + \gamma v_k(k + (qm + p + 1)\ell) \\
 &< q_{k+1}^{\leftarrow}(i),
 \end{aligned}$$

where we concluded by observing that this is the same result as (12).

**E: In state**  $i = k + ((k-1)m + 1)\ell + 1$

$$\begin{aligned}
 q_{k+1}^{\leftarrow}(i) &= \gamma v_k(i-1) = \gamma v_k(k + ((k-1)m + 1)\ell) \\
 &= \gamma^{(k-1)(\ell m+1)+1} \left( \frac{\gamma^\ell - \gamma^{\ell(m+1)}}{1-\gamma^\ell} r_1 + \epsilon \right) \quad \{(10.b) \text{ with } q = k-1 \text{ and } p = 0\} \\
 &= \gamma^{(k-1)(\ell m+1)+1} \epsilon \quad \{r_1 = 0\} \\
 &> r_i \quad \{r_i < 0\} \\
 &= r_i + \gamma v_k(i + \ell - 1) \quad \{v_k(i + \ell + 1) = 0 \text{ (10.f)}\} \\
 &= q_{k+1}^{\rightarrow}(i).
 \end{aligned}$$

**F: In states**  $i > k + ((k - 1)m + 1)\ell + 1$  Following (10.f) we have  $v_k(i - 1) = v_k(i + \ell - 1) = 0$  and hence

$$q_{k+1}^{\leftarrow}(i) = 0 > r_i = q_{k+1}^{\rightarrow}(i).$$

### B.2.2. THE VALUE FUNCTION $v_{k+1}$

In the following we will show that the value function  $v_{k+1}$  satisfies Lemma 7. To that end we consider the value of  $((T_{k+1,\ell})^m T_{k+1} v_k)(s_0)$  by analysing the trajectories obtained by first following  $m$  times  $\pi_{k,\ell}$  then  $\pi_{k+1}$  from various starting states  $s_0$ .

Given a starting state  $s_0$  and a non stationary policy  $\pi_{k+1,\ell}$ , we will represent the trajectories as a sequence of triples  $(s_i, a_i, r(s_i, a_i))_{i=0,\dots,\ell m}$  arranged in a “trajectory matrix” of  $\ell$  columns and  $m$  rows. Each column corresponds to one of the policies  $\pi_{k+1}, \pi_k, \dots, \pi_{k+2-\ell}$ . In a column labeled by policy  $\pi_j$  the entries are of the form  $(s_i, \pi_j(s_i), r(s_i, \pi_j(s_i)))$ ; this layout makes clear which stationary policy is used to select the action in any particular step in the trajectory. Indeed, in column  $\pi_j$ , we have  $(s_i, \rightarrow, r_j)$  if and only if  $s_i = j$ , otherwise each entry is of the form  $(s_i, \leftarrow, 0)$ . Such a matrix accounts for the first  $m$  applications of the operator  $T_{k+1,\ell}$ . One additional row of only one triple  $(s_i, \pi_{k+1}(s_i), r_{\pi_{k+1}}(s_i))$  represents the final application of  $T_{k+1}$ . After this triple comes the end state of the trajectory  $s_{\ell m+1}$ .

|   |               |                         |                      |                      |
|---|---------------|-------------------------|----------------------|----------------------|
|   |               | $\ell = 3$ steps        |                      |                      |
|   |               | $\pi_4$                 | $\pi_3$              | $\pi_2$              |
| } | $m = 4$ times | $(10, \leftarrow, 0)$   | $(9, \leftarrow, 0)$ | $(8, \leftarrow, 0)$ |
|   |               | $(7, \leftarrow, 0)$    | $(6, \leftarrow, 0)$ | $(5, \leftarrow, 0)$ |
|   |               | $(4, \rightarrow, r_4)$ | $(6, \leftarrow, 0)$ | $(5, \leftarrow, 0)$ |
|   |               | $(4, \rightarrow, r_4)$ | $(6, \leftarrow, 0)$ | $(5, \leftarrow, 0)$ |
|   |               | $(4, \rightarrow, r_4)$ | 6                    |                      |

Figure 7. The trajectory matrix of policy  $\pi_{4,\ell}$  starting from state 10 with  $m = 4$  and  $\ell = 3$ .

**Example 2.** Figure 7 depicts the trajectory matrix of policy  $\pi_{4,\ell} = \pi_4 \pi_3 \pi_2$  with  $m = 4$  and  $\ell = 3$ . The trajectory starts from state  $s_0 = 10$  and ends in state  $s_{\ell m+1} = 6$ . The  $\leftarrow$  action is always taken with reward 0 except when in state 4 under the policy  $\pi_4$ . From this matrix we can deduce that, for any value function  $v$ :

$$\begin{aligned} ((T_{4,\ell})^m T_4 v)(10) &= \gamma^6 r_4 + \gamma^9 r_4 + \gamma^{12} r_4 + \gamma^{13} v(6) \\ &= \gamma^{2\ell} r_4 + \gamma^{3\ell} r_4 + \gamma^{4\ell} r_4 + \gamma^{4\ell+1} v(6) \\ &= \frac{\gamma^{2\ell} - \gamma^{(m+1)\ell}}{1 - \gamma^\ell} r_4 + \gamma^{\ell m+1} v(6). \end{aligned}$$

With this in hand, we are going to prove each case of Lemma 7 for  $v_{k+1}$ .

**In states**  $i < k + 1$  Following  $m$  times  $\pi_{k+1,\ell}$  and then  $\pi_{k+1}$  starting from these states consists in taking the  $\leftarrow$  action  $\ell m + 1$  times to eventually finish either in state 1 if  $i \leq \ell m + 2$  with value

$$v_{k+1}(i) = \gamma^{\ell m+1} v_k(1) + \epsilon_{k+1}(i) = -\gamma^{\ell m+1} \gamma^{(k-1)(\ell m+1)} \epsilon = -\gamma^{k(\ell m+1)} \epsilon$$

or otherwise in state  $i - \ell m - 1 < k$  with value

$$v_{k+1}(i) = \gamma^{\ell m+1} v_k(i - \ell m - 1) + \epsilon_{k+1}(i) = -\gamma^{\ell m+1} \gamma^{(k-1)(\ell m+1)} \epsilon = -\gamma^{k(\ell m+1)} \epsilon$$

This matches Equation (10.a) in both cases.

**In states**  $i = k + 1 + (qm + p + 1)\ell$  Consider the states  $i = k + 1 + (qm + p + 1)\ell$  with  $q \geq 0$  and  $0 \leq p < m$ . Following  $m$  times  $\pi_{k+1,\ell}$  and then  $\pi_{k+1}$  starting from state  $i$  gives the following trajectories:

- when  $q = 0$ , (i.e.  $i = k + 1 + (p + 1)\ell$ ):

$$\begin{array}{c}
 \ell \text{ steps} \\
 \hline
 \begin{array}{cccc}
 \pi_{k+1} & \pi_k & \dots & \pi_{k-\ell+2} \\
 \left. \begin{array}{l} p+1 \text{ times} \\ \vdots \\ \end{array} \right\} & \begin{array}{l} (k+1+(p+1)\ell, \leftarrow, 0) \\ (k+1+p\ell, \leftarrow, 0) \\ \vdots \\ (k+1+\ell, \leftarrow, 0) \end{array} & \begin{array}{l} (k+(p+1)\ell, \leftarrow, 0) \\ (k+p\ell, \leftarrow, 0) \\ \vdots \\ (k+\ell, \leftarrow, 0) \end{array} & \begin{array}{l} \dots \\ \dots \\ \dots \\ (k+2, \leftarrow, 0) \end{array} \\
 \left. \begin{array}{l} m-p-1 \text{ times} \\ \vdots \\ \end{array} \right\} & \begin{array}{l} (k+1, \rightarrow, r_{k+1}) \\ \vdots \\ (k+1, \rightarrow, r_{k+1}) \end{array} & \begin{array}{l} (k+\ell, \leftarrow, 0) \\ \vdots \\ (k+\ell, \leftarrow, 0) \end{array} & \begin{array}{l} (k+2, \leftarrow, 0) \\ \vdots \\ (k+2, \leftarrow, 0) \end{array} \\
 & & & \boxed{k+\ell}
 \end{array}
 \end{array}$$

Using (10.b) with  $q = p = 0$  as our induction hypothesis, this gives

$$\begin{aligned}
 ((T_{k+1,\ell})^m T_{k+1} v_k)(i) &= \sum_{j=p+1}^m \gamma^{\ell j} r_{k+1} + \gamma^{\ell(m+1)} v_k(k+\ell) \\
 &= \sum_{j=p+1}^m \gamma^{\ell j} r_{k+1} + \gamma^{\ell(m+1)} \left( \frac{\gamma^\ell - \gamma^{\ell(m+1)}}{1 - \gamma^\ell} r_k + \epsilon + \sum_{j=1}^{k-1} \gamma^{j(\ell m+1)} \left( \frac{\gamma^\ell - \gamma^{\ell(m+1)}}{1 - \gamma^\ell} r_{k-j} + \epsilon \right) \right) \\
 &= \frac{\gamma^{\ell(p+1)} - \gamma^{\ell(m+1)}}{1 - \gamma^\ell} r_{k+1} + \sum_{j=1}^k \gamma^{j(\ell m+1)} \left( \frac{\gamma^\ell - \gamma^{\ell(m+1)}}{1 - \gamma^\ell} r_{k-j} + \epsilon \right)
 \end{aligned}$$

Accounting for the error term and the fact that  $i = k + 1 + \ell \iff p = q = 0$ , we get

$$\begin{aligned}
 v_{k+1}(i) &= ((T_{k+1,\ell})^m T_{k+1} v_k)(i) + \mathbb{1}_{[i=k+1+\ell]} \epsilon \\
 &= \frac{\gamma^{\ell(p+1)} - \gamma^{\ell(m+1)}}{1 - \gamma^\ell} r_{k+1} + \mathbb{1}_{[p=0]} \epsilon + \sum_{j=1}^k \gamma^{j(\ell m+1)} \left( \frac{\gamma^\ell - \gamma^{\ell(m+1)}}{1 - \gamma^\ell} r_{k-j} + \epsilon \right)
 \end{aligned}$$

which is (10.b) for  $k + 1$  and  $q = 0$  as desired.

- when  $1 \leq q \leq k$ :

In this case we have  $i - (\ell m + 1) \geq k + 1$ , meaning that  $k + 1$ , the first state where the  $\rightarrow$  action would be available is unreachable (in the sense that the trajectory could end in  $k + 1$ , but no action will be taken there). Consequently the  $\leftarrow$  action is taken  $\ell m + 1$  times and the system ends in state  $i - \ell m - 1 = k + ((q - 1)m + p + 1)\ell$ . Therefore, using (10.b) as induction hypothesis and the fact that  $i \notin \{k + 1, k + \ell + 1\} \implies \epsilon_{k+1}(i) = 0$ , we have:

$$\begin{aligned}
 v_{k+1}(i) &= \gamma^{\ell m+1} v_k(k + ((q - 1)m + p + 1)\ell) + \epsilon_{k+1}(i) \\
 &= \gamma^{q(\ell m+1)} \left( \frac{\gamma^{\ell(p+1)} - \gamma^{\ell(m+1)}}{1 - \gamma^\ell} r_{k+1-q} + \mathbb{1}_{[p=0]} \epsilon + \sum_{i=1}^{k-q} \gamma^{i(\ell m+1)} \left( \frac{\gamma^\ell - \gamma^{\ell(m+1)}}{1 - \gamma^\ell} r_{k+1-q-k} + \epsilon \right) \right),
 \end{aligned}$$

which satisfies (10.b) for  $k + 1$ .

**In state**  $k + 1$  Following  $m$  times  $\pi_{k+1,\ell}$  and then  $\pi_{k+1}$  starting from  $k + 1$  gives the following trajectory:

$$\begin{array}{c}
 \overbrace{\hspace{10em}}^{\ell \text{ steps}} \\
 \begin{array}{cccc}
 \pi_{k+1} & \pi_k & \dots & \pi_{k-\ell+2} \\
 (k+1, \rightarrow, r_{k+1}) & (k+\ell, \leftarrow, 0) & \dots & (k+2, \leftarrow, 0) \\
 \vdots & \vdots & \vdots & \vdots \\
 (k+1, \rightarrow, r_{k+1}) & (k+\ell, \leftarrow, 0) & \dots & (k+2, \leftarrow, 0) \\
 (k+1, \rightarrow, r_{k+1}) & \boxed{k+\ell} & & 
 \end{array} \\
 \left. \begin{array}{c} \\ \\ \\ \\ \end{array} \right\} m \text{ times}
 \end{array}$$

As a consequence, with (10.c) as induction hypothesis we have:

$$\begin{aligned}
 ((T_{k+1,\ell})^m T_{k+1} v_k)(k+1) &= \frac{1 - \gamma^{\ell(m+1)}}{1 - \gamma^\ell} r_{k+1} + \gamma^{\ell(m+1)} v_k(k+\ell) \\
 &= r_{k+1} + \frac{\gamma^\ell - \gamma^{\ell(m+1)}}{1 - \gamma^\ell} r_{k+1} + \gamma^{\ell(m+1)} \left( \frac{\gamma^\ell - \gamma^{\ell(m+1)}}{1 - \gamma^\ell} r_k + \epsilon + \sum_{j=1}^{k-1} \gamma^{j(\ell m+1)} \left( \frac{\gamma^\ell - \gamma^{\ell(m+1)}}{1 - \gamma^\ell} r_{k-j} + \epsilon \right) \right) \\
 &= r_{k+1} + \frac{\gamma^\ell - \gamma^{\ell(m+1)}}{1 - \gamma^\ell} r_{k+1} + \sum_{j=1}^k \gamma^{j(\ell m+1)} \left( \frac{\gamma^\ell - \gamma^{\ell(m+1)}}{1 - \gamma^\ell} r_{k-j+1} + \epsilon \right) \\
 &= r_{k+1} + v_{k+1}(k+\ell+1) - \epsilon
 \end{aligned}$$

Hence,

$$\begin{aligned}
 v_{k+1}(k+1) &= ((T_{k+1,\ell})^m T_{k+1} v_k)(k+1) + \epsilon_{k+1}(k+1) \\
 &= v_{k+1}(k+\ell+1) + r_{k+1} - 2\epsilon,
 \end{aligned}$$

which matches (10.c).

**In states**  $i = k + 1 + q\ell + p$  For states  $i = k + 1 + q\ell + p$  with  $0 \leq q \leq km - 1$  and  $1 \leq p < \ell$ , the policy  $\pi_{k+1,\ell}$  always takes the  $\leftarrow$  action with either one of the following trajectories

- when  $q \geq m$ :

$$\begin{array}{c}
 \overbrace{\hspace{10em}}^{\ell \text{ steps}} \\
 \begin{array}{cccc}
 \pi_{k+1} & \pi_k & \dots & \pi_{k-\ell+2} \\
 (k+1+q\ell+p, \leftarrow, 0) & (k+q\ell+p, \leftarrow, 0) & \dots & (k+(q-1)\ell+p+2, \leftarrow, 0) \\
 \vdots & \vdots & \vdots & \vdots \\
 (k+1+(q-m)\ell+p, \leftarrow, 0) & (k+q\ell+p, \leftarrow, 0) & \dots & (k+(q-m)\ell+p+2, \leftarrow, 0) \\
 (k+1+(q-m)\ell+p, \leftarrow, 0) & \boxed{k+(q-m)\ell+p} & & 
 \end{array} \\
 \left. \begin{array}{c} \\ \\ \\ \\ \end{array} \right\} m \text{ times}
 \end{array}$$

As a consequence, with (10.d) as induction hypothesis we have:

$$v_{k+1}(i) = ((T_{k+1,\ell})^m T_{k+1} v_k)(i) = \gamma^{\ell(m+1)} v_k(k+(q-m)\ell+p) = -\gamma^{\ell(m+1)} \gamma^{(k-1)(\ell m+1)} \epsilon = -\gamma^{k(\ell m+1)} \epsilon$$

which satisfies (10.d) in this case.

- when  $q < m$ :

Assuming that negative states correspond to state 1, where the action is irrelevant, we have the following trajectory:

$$\begin{array}{c}
 \overbrace{\hspace{15em}}^{\ell \text{ steps}} \\
 \begin{array}{ccc}
 \pi_{k+1} & \dots & \pi_{k-\ell+2} \\
 (k+1+q\ell+p, \leftarrow, 0) & \dots & (k+(q-1)\ell+p+2, \leftarrow, 0) \\
 \vdots & \vdots & \vdots \\
 (k+1+\ell+p, \leftarrow, 0) & \dots & (k+p+2, \leftarrow, 0) \\
 (k+1+p, \leftarrow, 0) & \dots & (k-\ell+p+2, \leftarrow, 0) \\
 (k+1-\ell+p, \leftarrow, 0) & \dots & (k-2\ell+p+2, \leftarrow, 0) \\
 \vdots & \vdots & \vdots \\
 (k+1-(m-q-1)\ell+p, \leftarrow, 0) & \dots & (k-(m-q)\ell+p+2, \leftarrow, 0) \\
 (k+1-(m-q)\ell+p, \leftarrow, 0) & & \boxed{k+(q-m)\ell+p}
 \end{array}
 \end{array}
 \begin{array}{l}
 \\
 \\
 \left. \begin{array}{l} \\ \\ \\ \\ \\ \\ \\ \\ \\ \end{array} \right\} \begin{array}{l} q \text{ times} \\ \\ \\ \\ \\ \\ \\ \\ \\ \\ \end{array} \\
 \\
 \left. \begin{array}{l} \\ \\ \\ \\ \\ \\ \\ \\ \\ \\ \end{array} \right\} \begin{array}{l} \\ \\ \\ \\ \\ \\ \\ \\ \\ \\ \end{array} \\
 \\
 \\
 \\
 \\
 \\
 \\
 \\
 \\
 \\
 \end{array}$$

In the above trajectory, one can see that only the  $\leftarrow$  action is taken (ignoring state 1). Indeed, since we follow the policies  $\pi_{k+1}\pi_k, \dots, \pi_{k-\ell+2}$  the  $\rightarrow$  action may only be taken in states  $k+1, k, \dots, k-\ell+2$ . When state  $k+1$  is reached, the selected action is  $\pi_{k-p+1}(k+1)$  which is  $\leftarrow$  since  $p \geq 1$ . The same reasoning applies in the next states  $k, \dots, k-\ell+1$ , where  $p \geq 1$  prevents to use a policy that would select the  $\rightarrow$  action in those states.

Since  $p - \ell < 0$  the trajectory always terminates in a state  $j < k$  with value  $v_k(j) = -\gamma^{(k-1)(\ell m-1)}\epsilon$  as for the  $q \geq m$  case, which allows to conclude that (10.d) also holds in this case.

**In states  $i = k+1 + km\ell + p$**  Observe that following  $m$  times  $\pi_{k+1,\ell}$  and then  $\pi_{k+1}$  once amounts to always take  $\leftarrow$  actions. Thus, one eventually finishes in state  $k + (k-1)m\ell + p \geq k+1$ , which, since  $\epsilon_k(i) = 0$ , gives

$$v_{k+1}(i) = ((T_{k+1,\ell})^m T_{k+1} v_k)(i) = \gamma^{\ell m+1} v_k(k + (k-1)m\ell + p) = -\gamma^{\ell m+1} 0 = 0,$$

satisfying (10.e).

**In states  $i > k+1 + (km+1)\ell$**  In these states, the action  $\leftarrow$  is taken  $\ell m + 1$  times ending up in state  $j > k + ((k-1)m+1)\ell$ , with value  $v_k(j) = 0$ , from which  $v_{k+1}(i) = 0$  follows as required by (10.f).
